# Supplementary material
Source: MDPI journal article supplement (https://www.mdpi.com/2073-4441/16/8/1119)
Supplement: s1 [file Table S1.xlsx]

## Sheet: Sheet1
Well name	Longitude	Latitude
Beibei	106.617	29.9833
