# Supplementary material
Source: MDPI journal article supplement (https://www.mdpi.com/2073-4441/16/8/1119)
Supplement: s1 [file Table S2.xlsx]

## Sheet: 2016
2016010100	0.53
2016010101	0.533
2016010102	0.536
2016010103	0.537
2016010104	0.538
2016010105	0.539
2016010106	0.54
2016010107	0.541
2016010108	0.541
2016010109	0.541
2016010110	0.542
2016010111	0.542
2016010112	0.537
2016010113	0.533
2016010114	0.528
2016010115	0.529
2016010116	0.532
2016010117	0.534
2016010118	0.534
2016010119	0.535
2016010120	0.535
2016010121	0.534
2016010122	0.533
2016010123	0.533
2016010200	0.531
2016010201	0.529
2016010202	0.528
2016010203	0.527
2016010204	0.528
2016010205	0.527
2016010206	0.526
2016010207	0.527
2016010208	0.526
2016010209	0.527
2016010210	0.524
2016010211	0.519
2016010212	0.513
2016010213	0.507
2016010214	0.502
2016010215	0.5
2016010216	0.502
2016010217	0.505
2016010218	0.51
2016010219	0.513
2016010220	0.514
2016010221	0.514
2016010222	0.513
2016010223	0.511
2016010300	0.509
2016010301	0.505
2016010302	0.503
2016010303	0.505
2016010304	0.507
2016010305	0.508
2016010306	0.512
2016010307	0.516
2016010308	0.518
2016010309	0.519
2016010310	0.517
2016010311	0.514
2016010312	0.508
2016010313	0.501
2016010314	0.498
2016010315	0.5
2016010316	0.504
2016010317	0.509
2016010318	0.516
2016010319	0.522
2016010320	0.526
2016010321	0.527
2016010322	0.525
2016010323	0.523
2016010400	0.519
2016010401	0.515
2016010402	0.513
2016010403	0.512
2016010404	0.515
2016010405	0.517
2016010406	0.523
2016010407	0.528
2016010408	0.533
2016010409	0.535
2016010410	0.536
2016010411	0.533
2016010412	0.524
2016010413	0.516
2016010414	0.509
2016010415	0.506
2016010416	0.514
2016010417	0.521
2016010418	0.529
2016010419	0.535
2016010420	0.54
2016010421	0.543
2016010422	0.543
2016010423	0.539
2016010500	0.533
2016010501	0.527
2016010502	0.523
2016010503	0.52
2016010504	0.52
2016010505	0.518
2016010506	0.52
2016010507	0.526
2016010508	0.529
2016010509	0.532
2016010510	0.533
2016010511	0.527
2016010512	0.516
2016010513	0.507
2016010514	0.5
2016010515	0.496
2016010516	0.499
2016010517	0.504
2016010518	0.516
2016010519	0.528
2016010520	0.539
2016010521	0.547
2016010522	0.552
2016010523	0.552
2016010600	0.548
2016010601	0.541
2016010602	0.537
2016010603	0.535
2016010604	0.534
2016010605	0.535
2016010606	0.541
2016010607	0.549
2016010608	0.558
2016010609	0.565
2016010610	0.568
2016010611	0.565
2016010612	0.558
2016010613	0.549
2016010614	0.542
2016010615	0.539
2016010616	0.539
2016010617	0.541
2016010618	0.549
2016010619	0.559
2016010620	0.567
2016010621	0.574
2016010622	0.576
2016010623	0.574
2016010700	0.567
2016010701	0.557
2016010702	0.548
2016010703	0.542
2016010704	0.537
2016010705	0.536
2016010706	0.54
2016010707	0.547
2016010708	0.555
2016010709	0.564
2016010710	0.57
2016010711	0.569
2016010712	0.562
2016010713	0.555
2016010714	0.548
2016010715	0.543
2016010716	0.543
2016010717	0.547
2016010718	0.554
2016010719	0.565
2016010720	0.576
2016010721	0.585
2016010722	0.589
2016010723	0.589
2016010800	0.583
2016010801	0.573
2016010802	0.563
2016010803	0.552
2016010804	0.542
2016010805	0.535
2016010806	0.534
2016010807	0.54
2016010808	0.547
2016010809	0.554
2016010810	0.559
2016010811	0.558
2016010812	0.551
2016010813	0.54
2016010814	0.529
2016010815	0.522
2016010816	0.519
2016010817	0.519
2016010818	0.525
2016010819	0.535
2016010820	0.545
2016010821	0.555
2016010822	0.561
2016010823	0.563
2016010900	0.559
2016010901	0.551
2016010902	0.541
2016010903	0.531
2016010904	0.522
2016010905	0.515
2016010906	0.512
2016010907	0.517
2016010908	0.523
2016010909	0.533
2016010910	0.542
2016010911	0.544
2016010912	0.54
2016010913	0.532
2016010914	0.522
2016010915	0.516
2016010916	0.512
2016010917	0.512
2016010918	0.518
2016010919	0.527
2016010920	0.54
2016010921	0.552
2016010922	0.561
2016010923	0.566
2016011000	0.565
2016011001	0.56
2016011002	0.553
2016011003	0.543
2016011004	0.531
2016011005	0.521
2016011006	0.519
2016011007	0.52
2016011008	0.526
2016011009	0.535
2016011010	0.544
2016011011	0.548
2016011012	0.546
2016011013	0.54
2016011014	0.533
2016011015	0.528
2016011016	0.523
2016011017	0.522
2016011018	0.525
2016011019	0.534
2016011020	0.546
2016011021	0.559
2016011022	0.572
2016011023	0.58
2016011100	0.582
2016011101	0.583
2016011102	0.577
2016011103	0.567
2016011104	0.555
2016011105	0.543
2016011106	0.534
2016011107	0.531
2016011108	0.533
2016011109	0.541
2016011110	0.549
2016011111	0.552
2016011112	0.55
2016011113	0.544
2016011114	0.536
2016011115	0.528
2016011116	0.521
2016011117	0.517
2016011118	0.517
2016011119	0.521
2016011120	0.529
2016011121	0.539
2016011122	0.55
2016011123	0.56
2016011200	0.566
2016011201	0.566
2016011202	0.566
2016011203	0.56
2016011204	0.552
2016011205	0.542
2016011206	0.536
2016011207	0.534
2016011208	0.537
2016011209	0.542
2016011210	0.55
2016011211	0.556
2016011212	0.558
2016011213	0.554
2016011214	0.549
2016011215	0.544
2016011216	0.541
2016011217	0.536
2016011218	0.533
2016011219	0.536
2016011220	0.541
2016011221	0.548
2016011222	0.558
2016011223	0.569
2016011300	0.577
2016011301	0.581
2016011302	0.581
2016011303	0.578
2016011304	0.57
2016011305	0.561
2016011306	0.553
2016011307	0.549
2016011308	0.548
2016011309	0.551
2016011310	0.556
2016011311	0.559
2016011312	0.558
2016011313	0.555
2016011314	0.551
2016011315	0.546
2016011316	0.542
2016011317	0.537
2016011318	0.535
2016011319	0.536
2016011320	0.537
2016011321	0.54
2016011322	0.548
2016011323	0.556
2016011400	0.563
2016011401	0.569
2016011402	0.572
2016011403	0.572
2016011404	0.567
2016011405	0.562
2016011406	0.556
2016011407	0.551
2016011408	0.55
2016011409	0.55
2016011410	0.554
2016011411	0.556
2016011412	0.555
2016011413	0.553
2016011414	0.552
2016011415	0.552
2016011416	0.552
2016011417	0.549
2016011418	0.546
2016011419	0.545
2016011420	0.547
2016011421	0.55
2016011422	0.553
2016011423	0.556
2016011500	0.558
2016011501	0.56
2016011502	0.563
2016011503	0.562
2016011504	0.558
2016011505	0.552
2016011506	0.545
2016011507	0.54
2016011508	0.533
2016011509	0.531
2016011510	0.531
2016011511	0.529
2016011512	0.525
2016011513	0.52
2016011514	0.518
2016011515	0.517
2016011516	0.517
2016011517	0.516
2016011518	0.518
2016011519	0.518
2016011520	0.516
2016011521	0.514
2016011522	0.511
2016011523	0.512
2016011600	0.515
2016011601	0.517
2016011602	0.519
2016011603	0.519
2016011604	0.521
2016011605	0.518
2016011606	0.517
2016011607	0.518
2016011608	0.517
2016011609	0.518
2016011610	0.52
2016011611	0.52
2016011612	0.519
2016011613	0.519
2016011614	0.523
2016011615	0.528
2016011616	0.535
2016011617	0.541
2016011618	0.546
2016011619	0.55
2016011620	0.552
2016011621	0.553
2016011622	0.553
2016011623	0.553
2016011700	0.552
2016011701	0.553
2016011702	0.555
2016011703	0.559
2016011704	0.56
2016011705	0.561
2016011706	0.561
2016011707	0.562
2016011708	0.561
2016011709	0.559
2016011710	0.559
2016011711	0.555
2016011712	0.549
2016011713	0.542
2016011714	0.54
2016011715	0.541
2016011716	0.545
2016011717	0.548
2016011718	0.551
2016011719	0.557
2016011720	0.559
2016011721	0.557
2016011722	0.554
2016011723	0.55
2016011800	0.547
2016011801	0.545
2016011802	0.545
2016011803	0.546
2016011804	0.547
2016011805	0.55
2016011806	0.554
2016011807	0.559
2016011808	0.561
2016011809	0.564
2016011810	0.565
2016011811	0.562
2016011812	0.555
2016011813	0.548
2016011814	0.545
2016011815	0.546
2016011816	0.551
2016011817	0.558
2016011818	0.569
2016011819	0.577
2016011820	0.583
2016011821	0.584
2016011822	0.583
2016011823	0.579
2016011900	0.572
2016011901	0.566
2016011902	0.562
2016011903	0.559
2016011904	0.56
2016011905	0.56
2016011906	0.563
2016011907	0.568
2016011908	0.572
2016011909	0.574
2016011910	0.574
2016011911	0.568
2016011912	0.559
2016011913	0.548
2016011914	0.54
2016011915	0.537
2016011916	0.539
2016011917	0.545
2016011918	0.553
2016011919	0.563
2016011920	0.571
2016011921	0.578
2016011922	0.58
2016011923	0.579
2016012000	0.574
2016012001	0.567
2016012002	0.561
2016012003	0.559
2016012004	0.559
2016012005	0.56
2016012006	0.565
2016012007	0.573
2016012008	0.581
2016012009	0.587
2016012010	0.59
2016012011	0.586
2016012012	0.578
2016012013	0.567
2016012014	0.558
2016012015	0.554
2016012016	0.557
2016012017	0.564
2016012018	0.574
2016012019	0.588
2016012020	0.6
2016012021	0.61
2016012022	0.615
2016012023	0.615
2016012100	0.611
2016012101	0.602
2016012102	0.592
2016012103	0.584
2016012104	0.578
2016012105	0.575
2016012106	0.577
2016012107	0.584
2016012108	0.59
2016012109	0.596
2016012110	0.6
2016012111	0.597
2016012112	0.588
2016012113	0.573
2016012114	0.561
2016012115	0.552
2016012116	0.549
2016012117	0.55
2016012118	0.557
2016012119	0.568
2016012120	0.581
2016012121	0.592
2016012122	0.599
2016012123	0.602
2016012200	0.6
2016012201	0.596
2016012202	0.588
2016012203	0.581
2016012204	0.576
2016012205	0.572
2016012206	0.576
2016012207	0.585
2016012208	0.595
2016012209	0.605
2016012210	0.612
2016012211	0.614
2016012212	0.61
2016012213	0.601
2016012214	0.592
2016012215	0.587
2016012216	0.588
2016012217	0.594
2016012218	0.604
2016012219	0.618
2016012220	0.634
2016012221	0.649
2016012222	0.662
2016012223	0.669
2016012300	0.671
2016012301	0.666
2016012302	0.658
2016012303	0.647
2016012304	0.638
2016012305	0.631
2016012306	0.629
2016012307	0.632
2016012308	0.638
2016012309	0.647
2016012310	0.654
2016012311	0.656
2016012312	0.65
2016012313	0.639
2016012314	0.626
2016012315	0.616
2016012316	0.611
2016012317	0.61
2016012318	0.617
2016012319	0.628
2016012320	0.641
2016012321	0.655
2016012322	0.667
2016012323	0.674
2016012400	0.676
2016012401	0.673
2016012402	0.665
2016012403	0.654
2016012404	0.643
2016012405	0.634
2016012406	0.63
2016012407	0.631
2016012408	0.638
2016012409	0.645
2016012410	0.652
2016012411	0.659
2016012412	0.651
2016012413	0.641
2016012414	0.63
2016012415	0.617
2016012416	0.608
2016012417	0.603
2016012418	0.603
2016012419	0.609
2016012420	0.617
2016012421	0.627
2016012422	0.637
2016012423	0.643
2016012500	0.644
2016012501	0.64
2016012502	0.632
2016012503	0.619
2016012504	0.604
2016012505	0.59
2016012506	0.582
2016012507	0.582
2016012508	0.584
2016012509	0.588
2016012510	0.594
2016012511	0.596
2016012512	0.593
2016012513	0.584
2016012514	0.573
2016012515	0.561
2016012516	0.552
2016012517	0.547
2016012518	0.545
2016012519	0.548
2016012520	0.555
2016012521	0.564
2016012522	0.575
2016012523	0.582
2016012600	0.587
2016012601	0.588
2016012602	0.583
2016012603	0.576
2016012604	0.566
2016012605	0.553
2016012606	0.546
2016012607	0.543
2016012608	0.545
2016012609	0.551
2016012610	0.558
2016012611	0.563
2016012612	0.56
2016012613	0.553
2016012614	0.546
2016012615	0.54
2016012616	0.534
2016012617	0.525
2016012618	0.521
2016012619	0.523
2016012620	0.53
2016012621	0.535
2016012622	0.542
2016012623	0.55
2016012700	0.556
2016012701	0.556
2016012702	0.554
2016012703	0.549
2016012704	0.54
2016012705	0.53
2016012706	0.522
2016012707	0.518
2016012708	0.518
2016012709	0.522
2016012710	0.529
2016012711	0.533
2016012712	0.534
2016012713	0.531
2016012714	0.527
2016012715	0.523
2016012716	0.519
2016012717	0.514
2016012718	0.511
2016012719	0.514
2016012720	0.519
2016012721	0.524
2016012722	0.532
2016012723	0.542
2016012800	0.552
2016012801	0.557
2016012802	0.557
2016012803	0.555
2016012804	0.55
2016012805	0.544
2016012806	0.539
2016012807	0.534
2016012808	0.537
2016012809	0.544
2016012810	0.55
2016012811	0.553
2016012812	0.554
2016012813	0.555
2016012814	0.553
2016012815	0.549
2016012816	0.547
2016012817	0.545
2016012818	0.544
2016012819	0.545
2016012820	0.55
2016012821	0.555
2016012822	0.56
2016012823	0.565
2016012900	0.571
2016012901	0.577
2016012902	0.58
2016012903	0.577
2016012904	0.574
2016012905	0.568
2016012906	0.563
2016012907	0.56
2016012908	0.559
2016012909	0.561
2016012910	0.566
2016012911	0.568
2016012912	0.566
2016012913	0.563
2016012914	0.559
2016012915	0.557
2016012916	0.557
2016012917	0.555
2016012918	0.554
2016012919	0.557
2016012920	0.559
2016012921	0.562
2016012922	0.565
2016012923	0.57
2016013000	0.574
2016013001	0.578
2016013002	0.579
2016013003	0.577
2016013004	0.573
2016013005	0.566
2016013006	0.562
2016013007	0.559
2016013008	0.557
2016013009	0.549
2016013010	0.552
2016013011	0.551
2016013012	0.554
2016013013	0.552
2016013014	0.549
2016013015	0.545
2016013016	0.545
2016013017	0.545
2016013018	0.544
2016013019	0.542
2016013020	0.544
2016013021	0.548
2016013022	0.553
2016013023	0.56
2016013100	0.563
2016013101	0.567
2016013102	0.57
2016013103	0.573
2016013104	0.573
2016013105	0.572
2016013106	0.574
2016013107	0.576
2016013108	0.579
2016013109	0.581
2016013110	0.584
2016013111	0.588
2016013112	0.587
2016013113	0.586
2016013114	0.586
2016013115	0.587
2016013116	0.591
2016013117	0.597
2016013118	0.603
2016013119	0.609
2016013120	0.613
2016013121	0.616
2016013122	0.617
2016013123	0.615
2016020100	0.613
2016020101	0.612
2016020102	0.613
2016020103	0.613
2016020104	0.61
2016020105	0.607
2016020106	0.607
2016020107	0.608
2016020108	0.608
2016020109	0.609
2016020110	0.61
2016020111	0.608
2016020112	0.604
2016020113	0.6
2016020114	0.598
2016020115	0.599
2016020116	0.6
2016020117	0.603
2016020118	0.607
2016020119	0.611
2016020120	0.614
2016020121	0.613
2016020122	0.611
2016020123	0.608
2016020200	0.604
2016020201	0.601
2016020202	0.598
2016020203	0.596
2016020204	0.595
2016020205	0.593
2016020206	0.593
2016020207	0.594
2016020208	0.593
2016020209	0.592
2016020210	0.59
2016020211	0.586
2016020212	0.579
2016020213	0.572
2016020214	0.566
2016020215	0.561
2016020216	0.561
2016020217	0.564
2016020218	0.569
2016020219	0.575
2016020220	0.579
2016020221	0.58
2016020222	0.577
2016020223	0.573
2016020300	0.568
2016020301	0.562
2016020302	0.558
2016020303	0.555
2016020304	0.552
2016020305	0.551
2016020306	0.553
2016020307	0.556
2016020308	0.56
2016020309	0.562
2016020310	0.562
2016020311	0.559
2016020312	0.553
2016020313	0.545
2016020314	0.54
2016020315	0.54
2016020316	0.543
2016020317	0.549
2016020318	0.56
2016020319	0.572
2016020320	0.581
2016020321	0.588
2016020322	0.591
2016020323	0.589
2016020400	0.584
2016020401	0.579
2016020402	0.575
2016020403	0.573
2016020404	0.572
2016020405	0.575
2016020406	0.579
2016020407	0.583
2016020408	0.59
2016020409	0.594
2016020410	0.595
2016020411	0.589
2016020412	0.579
2016020413	0.567
2016020414	0.557
2016020415	0.551
2016020416	0.553
2016020417	0.56
2016020418	0.569
2016020419	0.581
2016020420	0.594
2016020421	0.601
2016020422	0.603
2016020423	0.603
2016020500	0.598
2016020501	0.592
2016020502	0.584
2016020503	0.578
2016020504	0.577
2016020505	0.576
2016020506	0.582
2016020507	0.588
2016020508	0.596
2016020509	0.602
2016020510	0.607
2016020511	0.607
2016020512	0.601
2016020513	0.591
2016020514	0.581
2016020515	0.575
2016020516	0.574
2016020517	0.578
2016020518	0.59
2016020519	0.605
2016020520	0.619
2016020521	0.63
2016020522	0.636
2016020523	0.635
2016020600	0.628
2016020601	0.621
2016020602	0.614
2016020603	0.603
2016020604	0.592
2016020605	0.588
2016020606	0.591
2016020607	0.599
2016020608	0.606
2016020609	0.614
2016020610	0.62
2016020611	0.622
2016020612	0.615
2016020613	0.604
2016020614	0.594
2016020615	0.585
2016020616	0.581
2016020617	0.583
2016020618	0.589
2016020619	0.601
2016020620	0.612
2016020621	0.622
2016020622	0.627
2016020623	0.629
2016020700	0.625
2016020701	0.617
2016020702	0.606
2016020703	0.594
2016020704	0.585
2016020705	0.58
2016020706	0.578
2016020707	0.583
2016020708	0.591
2016020709	0.6
2016020710	0.606
2016020711	0.608
2016020712	0.601
2016020713	0.588
2016020714	0.574
2016020715	0.563
2016020716	0.553
2016020717	0.548
2016020718	0.55
2016020719	0.557
2016020720	0.568
2016020721	0.58
2016020722	0.588
2016020723	0.593
2016020800	0.591
2016020801	0.585
2016020802	0.574
2016020803	0.56
2016020804	0.547
2016020805	0.538
2016020806	0.533
2016020807	0.534
2016020808	0.542
2016020809	0.551
2016020810	0.56
2016020811	0.563
2016020812	0.558
2016020813	0.547
2016020814	0.536
2016020815	0.525
2016020816	0.516
2016020817	0.513
2016020818	0.516
2016020819	0.524
2016020820	0.536
2016020821	0.549
2016020822	0.561
2016020823	0.569
2016020900	0.572
2016020901	0.569
2016020902	0.563
2016020903	0.553
2016020904	0.542
2016020905	0.533
2016020906	0.529
2016020907	0.532
2016020908	0.539
2016020909	0.548
2016020910	0.558
2016020911	0.563
2016020912	0.561
2016020913	0.553
2016020914	0.542
2016020915	0.53
2016020916	0.52
2016020917	0.513
2016020918	0.511
2016020919	0.514
2016020920	0.521
2016020921	0.531
2016020922	0.541
2016020923	0.549
2016021000	0.552
2016021001	0.552
2016021002	0.546
2016021003	0.536
2016021004	0.524
2016021005	0.512
2016021006	0.506
2016021007	0.505
2016021008	0.51
2016021009	0.517
2016021010	0.526
2016021011	0.533
2016021012	0.536
2016021013	0.531
2016021014	0.523
2016021015	0.516
2016021016	0.507
2016021017	0.5
2016021018	0.498
2016021019	0.5
2016021020	0.504
2016021021	0.513
2016021022	0.524
2016021023	0.535
2016021100	0.542
2016021101	0.546
2016021102	0.546
2016021103	0.541
2016021104	0.532
2016021105	0.524
2016021106	0.519
2016021107	0.518
2016021108	0.521
2016021109	0.526
2016021110	0.533
2016021111	0.54
2016021112	0.542
2016021113	0.542
2016021114	0.539
2016021115	0.53
2016021116	0.522
2016021117	0.515
2016021118	0.51
2016021119	0.506
2016021120	0.507
2016021121	0.51
2016021122	0.518
2016021123	0.525
2016021200	0.532
2016021201	0.536
2016021202	0.534
2016021203	0.532
2016021204	0.527
2016021205	0.521
2016021206	0.516
2016021207	0.514
2016021208	0.514
2016021209	0.518
2016021210	0.524
2016021211	0.53
2016021212	0.534
2016021213	0.537
2016021214	0.537
2016021215	0.537
2016021216	0.537
2016021217	0.537
2016021218	0.539
2016021219	0.54
2016021220	0.544
2016021221	0.548
2016021222	0.558
2016021223	0.567
2016021300	0.577
2016021301	0.584
2016021302	0.586
2016021303	0.588
2016021304	0.589
2016021305	0.588
2016021306	0.584
2016021307	0.583
2016021308	0.585
2016021309	0.59
2016021310	0.596
2016021311	0.601
2016021312	0.605
2016021313	0.61
2016021314	0.613
2016021315	0.619
2016021316	0.621
2016021317	0.624
2016021318	0.626
2016021319	0.625
2016021320	0.628
2016021321	0.627
2016021322	0.629
2016021323	0.635
2016021400	0.64
2016021401	0.646
2016021402	0.65
2016021403	0.649
2016021404	0.649
2016021405	0.648
2016021406	0.647
2016021407	0.647
2016021408	0.649
2016021409	0.65
2016021410	0.653
2016021411	0.657
2016021412	0.659
2016021413	0.66
2016021414	0.662
2016021415	0.664
2016021416	0.668
2016021417	0.671
2016021418	0.672
2016021419	0.675
2016021420	0.676
2016021421	0.676
2016021422	0.676
2016021423	0.675
2016021500	0.673
2016021501	0.673
2016021502	0.671
2016021503	0.671
2016021504	0.67
2016021505	0.668
2016021506	0.666
2016021507	0.664
2016021508	0.662
2016021509	0.66
2016021510	0.658
2016021511	0.655
2016021512	0.652
2016021513	0.647
2016021514	0.644
2016021515	0.643
2016021516	0.643
2016021517	0.648
2016021518	0.652
2016021519	0.656
2016021520	0.66
2016021521	0.661
2016021522	0.66
2016021523	0.657
2016021600	0.653
2016021601	0.65
2016021602	0.648
2016021603	0.648
2016021604	0.648
2016021605	0.647
2016021606	0.648
2016021607	0.65
2016021608	0.651
2016021609	0.651
2016021610	0.649
2016021611	0.645
2016021612	0.639
2016021613	0.633
2016021614	0.627
2016021615	0.625
2016021616	0.628
2016021617	0.632
2016021618	0.639
2016021619	0.645
2016021620	0.65
2016021621	0.655
2016021622	0.653
2016021623	0.65
2016021700	0.643
2016021701	0.637
2016021702	0.634
2016021703	0.631
2016021704	0.627
2016021705	0.627
2016021706	0.63
2016021707	0.634
2016021708	0.638
2016021709	0.641
2016021710	0.639
2016021711	0.634
2016021712	0.627
2016021713	0.617
2016021714	0.609
2016021715	0.608
2016021716	0.61
2016021717	0.616
2016021718	0.624
2016021719	0.635
2016021720	0.644
2016021721	0.649
2016021722	0.65
2016021723	0.647
2016021800	0.643
2016021801	0.636
2016021802	0.629
2016021803	0.623
2016021804	0.619
2016021805	0.617
2016021806	0.618
2016021807	0.623
2016021808	0.627
2016021809	0.628
2016021810	0.625
2016021811	0.619
2016021812	0.607
2016021813	0.594
2016021814	0.582
2016021815	0.575
2016021816	0.573
2016021817	0.578
2016021818	0.589
2016021819	0.603
2016021820	0.618
2016021821	0.628
2016021822	0.634
2016021823	0.636
2016021900	0.632
2016021901	0.627
2016021902	0.622
2016021903	0.617
2016021904	0.615
2016021905	0.615
2016021906	0.621
2016021907	0.628
2016021908	0.637
2016021909	0.645
2016021910	0.648
2016021911	0.645
2016021912	0.639
2016021913	0.628
2016021914	0.617
2016021915	0.61
2016021916	0.613
2016021917	0.62
2016021918	0.632
2016021919	0.65
2016021920	0.666
2016021921	0.679
2016021922	0.687
2016021923	0.69
2016022000	0.686
2016022001	0.681
2016022002	0.671
2016022003	0.662
2016022004	0.654
2016022005	0.65
2016022006	0.65
2016022007	0.654
2016022008	0.661
2016022009	0.667
2016022010	0.669
2016022011	0.666
2016022012	0.658
2016022013	0.645
2016022014	0.63
2016022015	0.615
2016022016	0.607
2016022017	0.607
2016022018	0.611
2016022019	0.617
2016022020	0.623
2016022021	0.631
2016022022	0.635
2016022023	0.634
2016022100	0.629
2016022101	0.622
2016022102	0.607
2016022103	0.592
2016022104	0.578
2016022105	0.571
2016022106	0.571
2016022107	0.578
2016022108	0.587
2016022109	0.598
2016022110	0.604
2016022111	0.606
2016022112	0.605
2016022113	0.6
2016022114	0.595
2016022115	0.593
2016022116	0.594
2016022117	0.596
2016022118	0.602
2016022119	0.617
2016022120	0.634
2016022121	0.649
2016022122	0.663
2016022123	0.67
2016022200	0.673
2016022201	0.673
2016022202	0.664
2016022203	0.654
2016022204	0.645
2016022205	0.637
2016022206	0.635
2016022207	0.641
2016022208	0.648
2016022209	0.658
2016022210	0.667
2016022211	0.671
2016022212	0.668
2016022213	0.657
2016022214	0.645
2016022215	0.636
2016022216	0.628
2016022217	0.625
2016022218	0.627
2016022219	0.633
2016022220	0.646
2016022221	0.661
2016022222	0.674
2016022223	0.683
2016022300	0.689
2016022301	0.691
2016022302	0.687
2016022303	0.677
2016022304	0.668
2016022305	0.66
2016022306	0.658
2016022307	0.66
2016022308	0.668
2016022309	0.677
2016022310	0.685
2016022311	0.692
2016022312	0.694
2016022313	0.687
2016022314	0.677
2016022315	0.667
2016022316	0.659
2016022317	0.654
2016022318	0.655
2016022319	0.66
2016022320	0.669
2016022321	0.681
2016022322	0.692
2016022323	0.699
2016022400	0.702
2016022401	0.703
2016022402	0.697
2016022403	0.688
2016022404	0.679
2016022405	0.67
2016022406	0.666
2016022407	0.667
2016022408	0.673
2016022409	0.681
2016022410	0.687
2016022411	0.692
2016022412	0.691
2016022413	0.684
2016022414	0.675
2016022415	0.665
2016022416	0.656
2016022417	0.649
2016022418	0.646
2016022419	0.648
2016022420	0.654
2016022421	0.662
2016022422	0.671
2016022423	0.68
2016022500	0.685
2016022501	0.686
2016022502	0.684
2016022503	0.676
2016022504	0.668
2016022505	0.66
2016022506	0.655
2016022507	0.657
2016022508	0.66
2016022509	0.666
2016022510	0.675
2016022511	0.681
2016022512	0.683
2016022513	0.68
2016022514	0.674
2016022515	0.666
2016022516	0.658
2016022517	0.652
2016022518	0.65
2016022519	0.651
2016022520	0.658
2016022521	0.666
2016022522	0.675
2016022523	0.683
2016022600	0.689
2016022601	0.69
2016022602	0.688
2016022603	0.682
2016022604	0.674
2016022605	0.668
2016022606	0.663
2016022607	0.661
2016022608	0.661
2016022609	0.663
2016022610	0.667
2016022611	0.669
2016022612	0.667
2016022613	0.662
2016022614	0.654
2016022615	0.646
2016022616	0.638
2016022617	0.629
2016022618	0.624
2016022619	0.623
2016022620	0.624
2016022621	0.63
2016022622	0.636
2016022623	0.642
2016022700	0.647
2016022701	0.65
2016022702	0.65
2016022703	0.646
2016022704	0.639
2016022705	0.633
2016022706	0.628
2016022707	0.626
2016022708	0.628
2016022709	0.631
2016022710	0.634
2016022711	0.637
2016022712	0.639
2016022713	0.637
2016022714	0.634
2016022715	0.629
2016022716	0.623
2016022717	0.618
2016022718	0.615
2016022719	0.614
2016022720	0.615
2016022721	0.618
2016022722	0.624
2016022723	0.63
2016022800	0.636
2016022801	0.64
2016022802	0.64
2016022803	0.641
2016022804	0.639
2016022805	0.637
2016022806	0.635
2016022807	0.636
2016022808	0.639
2016022809	0.643
2016022810	0.648
2016022811	0.653
2016022812	0.656
2016022813	0.658
2016022814	0.657
2016022815	0.657
2016022816	0.655
2016022817	0.652
2016022818	0.651
2016022819	0.651
2016022820	0.651
2016022821	0.655
2016022822	0.659
2016022823	0.662
2016022900	0.665
2016022901	0.668
2016022902	0.67
2016022903	0.67
2016022904	0.668
2016022905	0.666
2016022906	0.664
2016022907	0.662
2016022908	0.661
2016022909	0.66
2016022910	0.658
2016022911	0.657
2016022912	0.653
2016022913	0.647
2016022914	0.641
2016022915	0.635
2016022916	0.63
2016022917	0.625
2016022918	0.62
2016022919	0.616
2016022920	0.614
2016022921	0.614
2016022922	0.614
2016022923	0.615
2016030100	0.614
2016030101	0.614
2016030102	0.614
2016030103	0.614
2016030104	0.614
2016030105	0.613
2016030106	0.613
2016030107	0.613
2016030108	0.614
2016030109	0.616
2016030110	0.616
2016030111	0.616
2016030112	0.615
2016030113	0.613
2016030114	0.611
2016030115	0.612
2016030116	0.615
2016030117	0.616
2016030118	0.619
2016030119	0.622
2016030120	0.627
2016030121	0.63
2016030122	0.632
2016030123	0.634
2016030200	0.633
2016030201	0.633
2016030202	0.634
2016030203	0.635
2016030204	0.636
2016030205	0.64
2016030206	0.644
2016030207	0.648
2016030208	0.652
2016030209	0.654
2016030210	0.652
2016030211	0.651
2016030212	0.65
2016030213	0.647
2016030214	0.645
2016030215	0.643
2016030216	0.646
2016030217	0.649
2016030218	0.653
2016030219	0.658
2016030220	0.66
2016030221	0.659
2016030222	0.657
2016030223	0.654
2016030300	0.649
2016030301	0.645
2016030302	0.641
2016030303	0.641
2016030304	0.642
2016030305	0.643
2016030306	0.646
2016030307	0.649
2016030308	0.651
2016030309	0.652
2016030310	0.65
2016030311	0.647
2016030312	0.64
2016030313	0.632
2016030314	0.624
2016030315	0.62
2016030316	0.62
2016030317	0.623
2016030318	0.628
2016030319	0.635
2016030320	0.639
2016030321	0.639
2016030322	0.637
2016030323	0.635
2016030400	0.628
2016030401	0.623
2016030402	0.618
2016030403	0.613
2016030404	0.611
2016030405	0.613
2016030406	0.618
2016030407	0.623
2016030408	0.628
2016030409	0.633
2016030410	0.634
2016030411	0.632
2016030412	0.628
2016030413	0.623
2016030414	0.618
2016030415	0.617
2016030416	0.618
2016030417	0.625
2016030418	0.635
2016030419	0.647
2016030420	0.657
2016030421	0.665
2016030422	0.669
2016030423	0.665
2016030500	0.661
2016030501	0.655
2016030502	0.65
2016030503	0.646
2016030504	0.643
2016030505	0.645
2016030506	0.65
2016030507	0.657
2016030508	0.666
2016030509	0.671
2016030510	0.67
2016030511	0.664
2016030512	0.655
2016030513	0.643
2016030514	0.632
2016030515	0.625
2016030516	0.622
2016030517	0.625
2016030518	0.631
2016030519	0.639
2016030520	0.649
2016030521	0.658
2016030522	0.662
2016030523	0.662
2016030600	0.656
2016030601	0.649
2016030602	0.64
2016030603	0.632
2016030604	0.626
2016030605	0.623
2016030606	0.627
2016030607	0.634
2016030608	0.643
2016030609	0.651
2016030610	0.653
2016030611	0.649
2016030612	0.64
2016030613	0.627
2016030614	0.613
2016030615	0.601
2016030616	0.595
2016030617	0.596
2016030618	0.602
2016030619	0.612
2016030620	0.626
2016030621	0.639
2016030622	0.646
2016030623	0.648
2016030700	0.644
2016030701	0.637
2016030702	0.627
2016030703	0.616
2016030704	0.608
2016030705	0.605
2016030706	0.607
2016030707	0.616
2016030708	0.628
2016030709	0.639
2016030710	0.646
2016030711	0.647
2016030712	0.642
2016030713	0.631
2016030714	0.617
2016030715	0.607
2016030716	0.601
2016030717	0.602
2016030718	0.608
2016030719	0.618
2016030720	0.63
2016030721	0.643
2016030722	0.649
2016030723	0.651
2016030800	0.648
2016030801	0.643
2016030802	0.631
2016030803	0.616
2016030804	0.606
2016030805	0.604
2016030806	0.605
2016030807	0.612
2016030808	0.625
2016030809	0.636
2016030810	0.644
2016030811	0.648
2016030812	0.647
2016030813	0.64
2016030814	0.629
2016030815	0.618
2016030816	0.61
2016030817	0.606
2016030818	0.613
2016030819	0.622
2016030820	0.632
2016030821	0.647
2016030822	0.659
2016030823	0.666
2016030900	0.665
2016030901	0.662
2016030902	0.65
2016030903	0.637
2016030904	0.624
2016030905	0.615
2016030906	0.614
2016030907	0.619
2016030908	0.628
2016030909	0.639
2016030910	0.649
2016030911	0.654
2016030912	0.654
2016030913	0.648
2016030914	0.638
2016030915	0.627
2016030916	0.619
2016030917	0.613
2016030918	0.613
2016030919	0.618
2016030920	0.631
2016030921	0.644
2016030922	0.66
2016030923	0.67
2016031000	0.677
2016031001	0.681
2016031002	0.677
2016031003	0.67
2016031004	0.66
2016031005	0.653
2016031006	0.648
2016031007	0.646
2016031008	0.652
2016031009	0.659
2016031010	0.668
2016031011	0.672
2016031012	0.672
2016031013	0.665
2016031014	0.653
2016031015	0.639
2016031016	0.624
2016031017	0.614
2016031018	0.607
2016031019	0.608
2016031020	0.613
2016031021	0.62
2016031022	0.629
2016031023	0.637
2016031100	0.64
2016031101	0.64
2016031102	0.634
2016031103	0.625
2016031104	0.614
2016031105	0.602
2016031106	0.594
2016031107	0.59
2016031108	0.593
2016031109	0.599
2016031110	0.604
2016031111	0.609
2016031112	0.609
2016031113	0.604
2016031114	0.595
2016031115	0.581
2016031116	0.568
2016031117	0.557
2016031118	0.548
2016031119	0.543
2016031120	0.541
2016031121	0.543
2016031122	0.547
2016031123	0.552
2016031200	0.555
2016031201	0.556
2016031202	0.554
2016031203	0.547
2016031204	0.538
2016031205	0.53
2016031206	0.524
2016031207	0.519
2016031208	0.519
2016031209	0.522
2016031210	0.53
2016031211	0.536
2016031212	0.539
2016031213	0.539
2016031214	0.537
2016031215	0.532
2016031216	0.528
2016031217	0.521
2016031218	0.518
2016031219	0.516
2016031220	0.518
2016031221	0.524
2016031222	0.532
2016031223	0.541
2016031300	0.548
2016031301	0.555
2016031302	0.56
2016031303	0.56
2016031304	0.559
2016031305	0.557
2016031306	0.556
2016031307	0.556
2016031308	0.559
2016031309	0.564
2016031310	0.571
2016031311	0.576
2016031312	0.579
2016031313	0.58
2016031314	0.581
2016031315	0.577
2016031316	0.575
2016031317	0.572
2016031318	0.569
2016031319	0.565
2016031320	0.563
2016031321	0.563
2016031322	0.564
2016031323	0.568
2016031400	0.567
2016031401	0.565
2016031402	0.565
2016031403	0.564
2016031404	0.561
2016031405	0.556
2016031406	0.553
2016031407	0.55
2016031408	0.549
2016031409	0.549
2016031410	0.549
2016031411	0.547
2016031412	0.546
2016031413	0.541
2016031414	0.536
2016031415	0.534
2016031416	0.53
2016031417	0.527
2016031418	0.524
2016031419	0.522
2016031420	0.519
2016031421	0.517
2016031422	0.516
2016031423	0.518
2016031500	0.516
2016031501	0.515
2016031502	0.518
2016031503	0.517
2016031504	0.517
2016031505	0.517
2016031506	0.518
2016031507	0.517
2016031508	0.518
2016031509	0.517
2016031510	0.514
2016031511	0.51
2016031512	0.507
2016031513	0.503
2016031514	0.502
2016031515	0.501
2016031516	0.5
2016031517	0.501
2016031518	0.504
2016031519	0.506
2016031520	0.507
2016031521	0.507
2016031522	0.505
2016031523	0.504
2016031600	0.501
2016031601	0.498
2016031602	0.496
2016031603	0.495
2016031604	0.494
2016031605	0.497
2016031606	0.502
2016031607	0.506
2016031608	0.509
2016031609	0.511
2016031610	0.51
2016031611	0.52
2016031612	0.525
2016031613	0.521
2016031614	0.518
2016031615	0.519
2016031616	0.523
2016031617	0.526
2016031618	0.532
2016031619	0.535
2016031620	0.54
2016031621	0.543
2016031622	0.54
2016031623	0.536
2016031700	0.53
2016031701	0.524
2016031702	0.519
2016031703	0.516
2016031704	0.515
2016031705	0.518
2016031706	0.522
2016031707	0.529
2016031708	0.535
2016031709	0.539
2016031710	0.539
2016031711	0.537
2016031712	0.532
2016031713	0.525
2016031714	0.522
2016031715	0.52
2016031716	0.524
2016031717	0.529
2016031718	0.538
2016031719	0.547
2016031720	0.553
2016031721	0.555
2016031722	0.554
2016031723	0.55
2016031800	0.544
2016031801	0.536
2016031802	0.527
2016031803	0.519
2016031804	0.518
2016031805	0.521
2016031806	0.528
2016031807	0.533
2016031808	0.54
2016031809	0.544
2016031810	0.543
2016031811	0.539
2016031812	0.531
2016031813	0.521
2016031814	0.513
2016031815	0.507
2016031816	0.505
2016031817	0.508
2016031818	0.516
2016031819	0.525
2016031820	0.535
2016031821	0.542
2016031822	0.545
2016031823	0.543
2016031900	0.538
2016031901	0.53
2016031902	0.522
2016031903	0.515
2016031904	0.513
2016031905	0.516
2016031906	0.521
2016031907	0.527
2016031908	0.534
2016031909	0.538
2016031910	0.54
2016031911	0.537
2016031912	0.529
2016031913	0.518
2016031914	0.507
2016031915	0.499
2016031916	0.493
2016031917	0.494
2016031918	0.5
2016031919	0.509
2016031920	0.52
2016031921	0.53
2016031922	0.534
2016031923	0.534
2016032000	0.528
2016032001	0.521
2016032002	0.512
2016032003	0.503
2016032004	0.499
2016032005	0.501
2016032006	0.506
2016032007	0.513
2016032008	0.524
2016032009	0.533
2016032010	0.538
2016032011	0.538
2016032012	0.534
2016032013	0.525
2016032014	0.516
2016032015	0.509
2016032016	0.507
2016032017	0.508
2016032018	0.513
2016032019	0.523
2016032020	0.536
2016032021	0.548
2016032022	0.556
2016032023	0.558
2016032100	0.554
2016032101	0.547
2016032102	0.537
2016032103	0.527
2016032104	0.52
2016032105	0.518
2016032106	0.522
2016032107	0.53
2016032108	0.54
2016032109	0.549
2016032110	0.556
2016032111	0.558
2016032112	0.553
2016032113	0.544
2016032114	0.533
2016032115	0.521
2016032116	0.513
2016032117	0.511
2016032118	0.513
2016032119	0.522
2016032120	0.534
2016032121	0.544
2016032122	0.551
2016032123	0.556
2016032200	0.553
2016032201	0.544
2016032202	0.533
2016032203	0.523
2016032204	0.513
2016032205	0.507
2016032206	0.511
2016032207	0.518
2016032208	0.528
2016032209	0.538
2016032210	0.545
2016032211	0.549
2016032212	0.547
2016032213	0.541
2016032214	0.531
2016032215	0.52
2016032216	0.513
2016032217	0.511
2016032218	0.514
2016032219	0.523
2016032220	0.536
2016032221	0.547
2016032222	0.557
2016032223	0.564
2016032300	0.566
2016032301	0.563
2016032302	0.558
2016032303	0.55
2016032304	0.543
2016032305	0.539
2016032306	0.543
2016032307	0.55
2016032308	0.561
2016032309	0.573
2016032310	0.581
2016032311	0.585
2016032312	0.586
2016032313	0.582
2016032314	0.574
2016032315	0.564
2016032316	0.555
2016032317	0.55
2016032318	0.55
2016032319	0.557
2016032320	0.568
2016032321	0.58
2016032322	0.591
2016032323	0.599
2016032400	0.602
2016032401	0.6
2016032402	0.593
2016032403	0.582
2016032404	0.572
2016032405	0.566
2016032406	0.564
2016032407	0.568
[truncated: 6,784 more rows]

## Sheet: 2008
2008041200	1.229
2008041201	1.228
2008041202	1.228
2008041203	1.229
2008041204	1.23
2008041205	1.231
2008041206	1.232
2008041207	1.237
2008041208	1.24
2008041209	1.244
2008041210	1.245
2008041211	1.244
2008041212	1.245
2008041213	1.244
2008041214	1.245
2008041215	1.246
2008041216	1.248
2008041217	1.249
2008041218	1.249
2008041219	1.25
2008041220	1.25
2008041221	1.251
2008041222	1.248
2008041223	1.24
2008041300	1.237
2008041301	1.233
2008041302	1.231
2008041303	1.23
2008041304	1.231
2008041305	1.232
2008041306	1.235
2008041307	1.239
2008041308	1.243
2008041309	1.246
2008041310	1.247
2008041311	1.243
2008041312	1.237
2008041313	1.231
2008041314	1.226
2008041315	1.222
2008041316	1.221
2008041317	1.222
2008041318	1.224
2008041319	1.229
2008041320	1.233
2008041321	1.233
2008041322	1.23
2008041323	1.222
2008041400	1.216
2008041401	1.209
2008041402	1.203
2008041403	1.2
2008041404	1.2
2008041405	1.201
2008041406	1.203
2008041407	1.21
2008041408	1.216
2008041409	1.218
2008041410	1.218
2008041411	1.215
2008041412	1.209
2008041413	1.202
2008041414	1.197
2008041415	1.195
2008041416	1.196
2008041417	1.198
2008041418	1.203
2008041419	1.21
2008041420	1.216
2008041421	1.22
2008041422	1.22
2008041423	1.214
2008041500	1.207
2008041501	1.201
2008041502	1.195
2008041503	1.19
2008041504	1.189
2008041505	1.192
2008041506	1.195
2008041507	1.202
2008041508	1.21
2008041509	1.215
2008041510	1.217
2008041511	1.213
2008041512	1.205
2008041513	1.196
2008041514	1.188
2008041515	1.184
2008041516	1.182
2008041517	1.185
2008041518	1.192
2008041519	1.201
2008041520	1.208
2008041521	1.215
2008041522	1.219
2008041523	1.215
2008041600	1.208
2008041601	1.201
2008041602	1.194
2008041603	1.19
2008041604	1.187
2008041605	1.188
2008041606	1.191
2008041607	1.199
2008041608	1.206
2008041609	1.211
2008041610	1.213
2008041611	1.212
2008041612	1.203
2008041613	1.193
2008041614	1.184
2008041615	1.178
2008041616	1.174
2008041617	1.176
2008041618	1.18
2008041619	1.189
2008041620	1.197
2008041621	1.206
2008041622	1.209
2008041623	1.208
2008041700	1.204
2008041701	1.198
2008041702	1.191
2008041703	1.185
2008041704	1.181
2008041705	1.18
2008041706	1.183
2008041707	1.196
2008041708	1.205
2008041709	1.207
2008041710	1.208
2008041711	1.208
2008041712	1.201
2008041713	1.184
2008041714	1.172
2008041715	1.162
2008041716	1.154
2008041717	1.15
2008041718	1.15
2008041719	1.16
2008041720	1.173
2008041721	1.182
2008041722	1.191
2008041723	1.194
2008041800	1.19
2008041801	1.18
2008041802	1.169
2008041803	1.163
2008041804	1.159
2008041805	1.157
2008041806	1.158
2008041807	1.166
2008041808	1.174
2008041809	1.183
2008041810	1.183
2008041811	1.18
2008041812	1.173
2008041813	1.164
2008041814	1.155
2008041815	1.15
2008041816	1.143
2008041817	1.14
2008041818	1.144
2008041819	1.153
2008041820	1.162
2008041821	1.171
2008041822	1.179
2008041823	1.183
2008041900	1.183
2008041901	1.182
2008041902	1.173
2008041903	1.164
2008041904	1.163
2008041905	1.165
2008041906	1.171
2008041907	1.178
2008041908	1.188
2008041909	1.196
2008041910	1.202
2008041911	1.209
2008041912	1.208
2008041913	1.201
2008041914	1.191
2008041915	1.182
2008041916	1.174
2008041917	1.172
2008041918	1.171
2008041919	1.177
2008041920	1.186
2008041921	1.196
2008041922	1.204
2008041923	1.208
2008042000	1.208
2008042001	1.206
2008042002	1.2
2008042003	1.194
2008042004	1.191
2008042005	1.191
2008042006	1.193
2008042007	1.2
2008042008	1.208
2008042009	1.217
2008042010	1.222
2008042011	1.227
2008042012	1.223
2008042013	1.217
2008042014	1.21
2008042015	1.199
2008042016	1.187
2008042017	1.179
2008042018	1.178
2008042019	1.182
2008042020	1.19
2008042021	1.2
2008042022	1.206
2008042023	1.212
2008042100	1.211
2008042101	1.206
2008042102	1.203
2008042103	1.196
2008042104	1.188
2008042105	1.187
2008042106	1.192
2008042107	1.201
2008042108	1.21
2008042109	1.22
2008042110	1.232
2008042111	1.235
2008042112	1.235
2008042113	1.23
2008042114	1.225
2008042115	1.215
2008042116	1.202
2008042117	1.193
2008042118	1.185
2008042119	1.182
2008042120	1.184
2008042121	1.191
2008042122	1.197
2008042123	1.201
2008042200	1.202
2008042201	1.201
2008042202	1.197
2008042203	1.191
2008042204	1.185
2008042205	1.18
2008042206	1.179
2008042207	1.183
2008042208	1.191
2008042209	1.198
2008042210	1.203
2008042211	1.205
2008042212	1.203
2008042213	1.198
2008042214	1.189
2008042215	1.177
2008042216	1.167
2008042217	1.16
2008042218	1.156
2008042219	1.159
2008042220	1.164
2008042221	1.171
2008042222	1.18
2008042223	1.189
2008042300	1.192
2008042301	1.19
2008042302	1.184
2008042303	1.176
2008042304	1.17
2008042305	1.165
2008042306	1.163
2008042307	1.167
2008042308	1.171
2008042309	1.178
2008042310	1.182
2008042311	1.185
2008042312	1.182
2008042313	1.178
2008042314	1.169
2008042315	1.157
2008042316	1.146
2008042317	1.137
2008042318	1.133
2008042319	1.132
2008042320	1.134
2008042321	1.139
2008042322	1.143
2008042323	1.146
2008042400	1.147
2008042401	1.145
2008042402	1.143
2008042403	1.137
2008042404	1.133
2008042405	1.128
2008042406	1.127
2008042407	1.13
2008042408	1.136
2008042409	1.142
2008042410	1.148
2008042411	1.152
2008042412	1.155
2008042413	1.156
2008042414	1.153
2008042415	1.149
2008042416	1.142
2008042417	1.137
2008042418	1.135
2008042419	1.134
2008042420	1.135
2008042421	1.14
2008042422	1.144
2008042423	1.148
2008042500	1.15
2008042501	1.152
2008042502	1.151
2008042503	1.148
2008042504	1.145
2008042505	1.144
2008042506	1.142
2008042507	1.143
2008042508	1.145
2008042509	1.148
2008042510	1.15
2008042511	1.153
2008042512	1.152
2008042513	1.15
2008042514	1.146
2008042515	1.141
2008042516	1.134
2008042517	1.128
2008042518	1.122
2008042519	1.119
2008042520	1.118
2008042521	1.12
2008042522	1.122
2008042523	1.124
2008042600	1.125
2008042601	1.123
2008042602	1.122
2008042603	1.121
2008042604	1.12
2008042605	1.122
2008042606	1.123
2008042607	1.129
2008042608	1.132
2008042609	1.133
2008042610	1.137
2008042611	1.137
2008042612	1.133
2008042613	1.134
2008042614	1.133
2008042615	1.129
2008042616	1.124
2008042617	1.122
2008042618	1.121
2008042619	1.121
2008042620	1.122
2008042621	1.124
2008042622	1.124
2008042623	1.125
2008042700	1.127
2008042701	1.125
2008042702	1.129
2008042703	1.134
2008042704	1.135
2008042705	1.136
2008042706	1.137
2008042707	1.141
2008042708	1.146
2008042709	1.148
2008042710	1.15
2008042711	1.15
2008042712	1.148
2008042713	1.148
2008042714	1.148
2008042715	1.147
2008042716	1.148
2008042717	1.15
2008042718	1.149
2008042719	1.151
2008042720	1.153
2008042721	1.156
2008042722	1.155
2008042723	1.152
2008042800	1.15
2008042801	1.149
2008042802	1.148
2008042803	1.15
2008042804	1.152
2008042805	1.152
2008042806	1.154
2008042807	1.158
2008042808	1.159
2008042809	1.157
2008042810	1.155
2008042811	1.151
2008042812	1.147
2008042813	1.143
2008042814	1.14
2008042815	1.136
2008042816	1.134
2008042817	1.134
2008042818	1.136
2008042819	1.137
2008042820	1.139
2008042821	1.14
2008042822	1.14
2008042823	1.133
2008042900	1.127
2008042901	1.124
2008042902	1.122
2008042903	1.123
2008042904	1.125
2008042905	1.127
2008042906	1.13
2008042907	1.135
2008042908	1.137
2008042909	1.138
2008042910	1.139
2008042911	1.136
2008042912	1.131
2008042913	1.128
2008042914	1.126
2008042915	1.127
2008042916	1.13
2008042917	1.134
2008042918	1.139
2008042919	1.145
2008042920	1.15
2008042921	1.155
2008042922	1.156
2008042923	1.152
2008043000	1.148
2008043001	1.143
2008043002	1.139
2008043003	1.138
2008043004	1.142
2008043005	1.147
2008043006	1.153
2008043007	1.16
2008043008	1.164
2008043009	1.164
2008043010	1.162
2008043011	1.155
2008043012	1.148
2008043013	1.141
2008043014	1.137
2008043015	1.132
2008043016	1.131
2008043017	1.132
2008043018	1.137
2008043019	1.143
2008043020	1.147
2008043021	1.15
2008043022	1.15
2008043023	1.146
2008050100	1.141
2008050101	1.134
2008050102	1.128
2008050103	1.123
2008050104	1.124
2008050105	1.129
2008050106	1.134
2008050107	1.141
2008050108	1.148
2008050109	1.149
2008050110	1.146
2008050111	1.139
2008050112	1.131
2008050113	1.121
2008050114	1.111
2008050115	1.106
2008050116	1.105
2008050117	1.107
2008050118	1.112
2008050119	1.121
2008050120	1.131
2008050121	1.139
2008050122	1.144
2008050123	1.141
2008050200	1.136
2008050201	1.132
2008050202	1.127
2008050203	1.124
2008050204	1.124
2008050205	1.13
2008050206	1.138
2008050207	1.151
2008050208	1.162
2008050209	1.169
2008050210	1.17
2008050211	1.166
2008050212	1.159
2008050213	1.149
2008050214	1.139
2008050215	1.133
2008050216	1.13
2008050217	1.129
2008050218	1.133
2008050219	1.143
2008050220	1.154
2008050221	1.163
2008050222	1.166
2008050223	1.164
2008050300	1.158
2008050301	1.15
2008050302	1.141
2008050303	1.136
2008050304	1.133
2008050305	1.135
2008050306	1.143
2008050307	1.155
2008050308	1.168
2008050309	1.178
2008050310	1.184
2008050311	1.183
2008050312	1.18
2008050313	1.175
2008050314	1.17
2008050315	1.166
2008050316	1.162
2008050317	1.163
2008050318	1.17
2008050319	1.181
2008050320	1.193
2008050321	1.204
2008050322	1.21
2008050323	1.214
2008050400	1.213
2008050401	1.207
2008050402	1.2
2008050403	1.193
2008050404	1.188
2008050405	1.188
2008050406	1.192
2008050407	1.202
2008050408	1.214
2008050409	1.223
2008050410	1.226
2008050411	1.226
2008050412	1.222
2008050413	1.213
2008050414	1.201
2008050415	1.187
2008050416	1.177
2008050417	1.172
2008050418	1.172
2008050419	1.179
2008050420	1.19
2008050421	1.2
2008050422	1.207
2008050423	1.21
2008050500	1.209
2008050501	1.203
2008050502	1.194
2008050503	1.186
2008050504	1.18
2008050505	1.179
2008050506	1.18
2008050507	1.189
2008050508	1.2
2008050509	1.208
2008050510	1.214
2008050511	1.215
2008050512	1.21
2008050513	1.202
2008050514	1.191
2008050515	1.176
2008050516	1.162
2008050517	1.152
2008050518	1.148
2008050519	1.151
2008050520	1.157
2008050521	1.167
2008050522	1.175
2008050523	1.178
2008050600	1.179
2008050601	1.175
2008050602	1.168
2008050603	1.16
2008050604	1.153
2008050605	1.15
2008050606	1.151
2008050607	1.156
2008050608	1.165
2008050609	1.175
2008050610	1.182
2008050611	1.186
2008050612	1.187
2008050613	1.182
2008050614	1.172
2008050615	1.158
2008050616	1.146
2008050617	1.137
2008050618	1.13
2008050619	1.129
2008050620	1.134
2008050621	1.143
2008050622	1.153
2008050623	1.159
2008050700	1.163
2008050701	1.163
2008050702	1.16
2008050703	1.155
2008050704	1.15
2008050705	1.15
2008050706	1.152
2008050707	1.158
2008050708	1.167
2008050709	1.175
2008050710	1.185
2008050711	1.193
2008050712	1.198
2008050713	1.197
2008050714	1.194
2008050715	1.188
2008050716	1.18
2008050717	1.172
2008050718	1.168
2008050719	1.167
2008050720	1.169
2008050721	1.177
2008050722	1.182
2008050723	1.185
2008050800	1.187
2008050801	1.187
2008050802	1.187
2008050803	1.185
2008050804	1.18
2008050805	1.176
2008050806	1.175
2008050807	1.177
2008050808	1.183
2008050809	1.19
2008050810	1.198
2008050811	1.205
2008050812	1.209
2008050813	1.211
2008050814	1.209
2008050815	1.205
2008050816	1.199
2008050817	1.192
2008050818	1.184
2008050819	1.18
2008050820	1.179
2008050821	1.18
2008050822	1.184
2008050823	1.188
2008050900	1.192
2008050901	1.196
2008050902	1.199
2008050903	1.199
2008050904	1.2
2008050905	1.2
2008050906	1.2
2008050907	1.203
2008050908	1.208
2008050909	1.211
2008050910	1.214
2008050911	1.215
2008050912	1.219
2008050913	1.224
2008050914	1.225
2008050915	1.223
2008050916	1.219
2008050917	1.214
2008050918	1.21
2008050919	1.207
2008050920	1.205
2008050921	1.204
2008050922	1.204
2008050923	1.204
2008051000	1.205
2008051001	1.205
2008051002	1.206
2008051003	1.207
2008051004	1.209
2008051005	1.208
2008051006	1.208
2008051007	1.208
2008051008	1.209
2008051009	1.21
2008051010	1.211
2008051011	1.21
2008051012	1.211
2008051013	1.211
2008051014	1.21
2008051015	1.209
2008051016	1.208
2008051017	1.205
2008051018	1.2
2008051019	1.198
2008051020	1.197
2008051021	1.196
2008051022	1.196
2008051023	1.194
2008051100	1.193
2008051101	1.194
2008051102	1.195
2008051103	1.194
2008051104	1.195
2008051105	1.194
2008051106	1.194
2008051107	1.194
2008051108	1.195
2008051109	1.193
2008051110	1.192
2008051111	1.19
2008051112	1.19
2008051113	1.19
2008051114	1.189
2008051115	1.19
2008051116	1.193
2008051117	1.195
2008051118	1.196
2008051119	1.197
2008051120	1.198
2008051121	1.197
2008051122	1.195
2008051123	1.194
2008051200	1.193
2008051201	1.191
2008051202	1.189
2008051203	1.19
2008051204	1.193
2008051205	1.197
2008051206	1.201
2008051207	1.203
2008051208	1.205
2008051209	1.203
2008051210	1.201
2008051211	1.198
2008051212	1.195
2008051213	1.192
2008051214	1.591
2008051215	1.998
2008051216	1.89
2008051217	1.846
2008051218	1.834
2008051219	1.833
2008051220	1.835
2008051221	1.835
2008051222	1.835
2008051223	1.838
2008051300	1.837
2008051301	1.837
2008051302	1.838
2008051303	1.843
2008051304	1.849
2008051305	1.852
2008051306	1.861
2008051307	1.869
2008051308	1.874
2008051309	1.877
2008051310	1.879
2008051311	1.883
2008051312	1.885
2008051313	1.886
2008051314	1.888
2008051315	1.897
2008051316	1.901
2008051317	1.904
2008051318	1.91
2008051319	1.918
2008051320	1.922
2008051321	1.922
2008051322	1.917
2008051323	1.917
2008051400	1.919
2008051401	1.918
2008051402	1.915
2008051403	1.916
2008051404	1.918
2008051405	1.921
2008051406	1.924
2008051407	1.929
2008051408	1.929
2008051409	1.93
2008051410	1.93
2008051411	1.93
2008051412	1.925
2008051413	1.918
2008051414	1.909
2008051415	1.905
2008051416	1.902
2008051417	1.9
2008051418	1.904
2008051419	1.913
2008051420	1.917
2008051421	1.918
2008051422	1.917
2008051423	1.917
2008051500	1.913
2008051501	1.908
2008051502	1.904
2008051503	1.905
2008051504	1.907
2008051505	1.912
2008051506	1.921
2008051507	1.927
2008051508	1.931
2008051509	1.933
2008051510	1.933
2008051511	1.934
2008051512	1.931
2008051513	1.926
2008051514	1.92
2008051515	1.918
2008051516	1.916
2008051517	1.918
2008051518	1.929
2008051519	1.938
2008051520	1.947
2008051521	1.951
2008051522	1.952
2008051523	1.951
2008051600	1.944
2008051601	1.936
2008051602	1.935
2008051603	1.937
2008051604	1.94
2008051605	1.942
2008051606	1.947
2008051607	1.955
2008051608	1.96
2008051609	1.963
2008051610	1.964
2008051611	1.964
2008051612	1.959
2008051613	1.953
2008051614	1.945
2008051615	1.941
2008051616	1.939
2008051617	1.937
2008051618	1.942
2008051619	1.951
2008051620	1.957
2008051621	1.962
2008051622	1.963
2008051623	1.965
2008051700	1.96
2008051701	1.954
2008051702	1.949
2008051703	1.946
2008051704	1.944
2008051705	1.945
2008051706	1.951
2008051707	1.958
2008051708	1.965
2008051709	1.966
2008051710	1.966
2008051711	1.967
2008051712	1.962
2008051713	1.954
2008051714	1.947
2008051715	1.944
2008051716	1.94
2008051717	1.939
2008051718	1.944
2008051719	1.956
2008051720	1.965
2008051721	1.972
2008051722	1.977
2008051723	1.981
2008051800	1.98
2008051801	1.978
2008051802	1.97
2008051803	1.967
2008051804	1.968
2008051805	1.972
2008051806	1.981
2008051807	1.992
2008051808	1.998
2008051809	2.003
2008051810	2.006
2008051811	2.009
2008051812	2.005
2008051813	1.998
2008051814	1.992
2008051815	1.991
2008051816	1.99
2008051817	1.989
2008051818	1.994
2008051819	2.004
2008051820	2.014
2008051821	2.023
2008051822	2.028
2008051823	2.035
2008051900	2.033
2008051901	2.027
2008051902	2.022
2008051903	2.019
2008051904	2.016
2008051905	2.016
2008051906	2.021
2008051907	2.028
2008051908	2.034
2008051909	2.041
2008051910	2.044
2008051911	2.046
2008051912	2.041
2008051913	2.034
2008051914	2.026
2008051915	2.022
2008051916	2.016
2008051917	2.013
2008051918	2.012
2008051919	2.02
2008051920	2.026
2008051921	2.03
2008051922	2.034
2008051923	2.038
2008052000	2.036
2008052001	2.03
2008052002	2.022
2008052003	2.02
2008052004	2.018
2008052005	2.016
2008052006	2.02
2008052007	2.027
2008052008	2.031
2008052009	2.033
2008052010	2.031
2008052011	2.035
2008052012	2.032
2008052013	2.025
2008052014	2.019
2008052015	2.015
2008052016	2.008
2008052017	2.002
2008052018	2.002
2008052019	2.009
2008052020	2.014
2008052021	2.019
2008052022	2.024
2008052023	2.029
2008052100	2.03
2008052101	2.026
2008052102	2.024
2008052103	2.024
2008052104	2.02
2008052105	2.018
2008052106	2.022
2008052107	2.029
2008052108	2.034
2008052109	2.039
2008052110	2.043
2008052111	2.049
2008052112	2.047
2008052113	2.043
2008052114	2.04
2008052115	2.038
2008052116	2.033
2008052117	2.028
2008052118	2.026
2008052119	2.03
2008052120	2.035
2008052121	2.04
2008052122	2.043
2008052123	2.048
2008052200	2.048
2008052201	2.045
2008052202	2.041
2008052203	2.04
2008052204	2.038
2008052205	2.035
2008052206	2.038
2008052207	2.044
2008052208	2.049
2008052209	2.052
2008052210	2.055
2008052211	2.059
2008052212	2.057
2008052213	2.047
2008052214	2.037
2008052215	2.027
2008052216	2.013
2008052217	2.001
2008052218	1.993
2008052219	1.993
2008052220	1.994
2008052221	1.994
2008052222	1.993
2008052223	1.998
2008052300	1.997
2008052301	1.994
2008052302	1.989
2008052303	1.989
2008052304	1.985
2008052305	1.98
2008052306	1.981
2008052307	1.986
2008052308	1.99
2008052309	1.992
2008052310	2
2008052311	2.007
2008052312	2.008
2008052313	2.006
2008052314	2.002
2008052315	2.001
2008052316	1.995
2008052317	1.989
2008052318	1.985
2008052319	1.987
2008052320	1.989
2008052321	1.991
2008052322	1.995
2008052323	2
2008052400	2
2008052401	2
2008052402	1.997
2008052403	1.997
2008052404	1.994
2008052405	1.99
2008052406	1.992
2008052407	1.995
2008052408	1.996
2008052409	1.999
2008052410	2.002
2008052411	2.008
2008052412	2.009
2008052413	2.007
2008052414	2.005
2008052415	2.004
2008052416	1.999
2008052417	1.994
2008052418	1.991
2008052419	1.992
2008052420	1.993
2008052421	1.994
2008052422	1.997
2008052423	2.003
2008052500	2.004
2008052501	2.004
2008052502	2.002
2008052503	2.002
2008052504	2
2008052505	1.997
2008052506	1.999
2008052507	2.001
2008052508	2
2008052509	2
2008052510	2.002
2008052511	2.006
2008052512	2.008
2008052513	2.008
2008052514	2.008
2008052515	2.009
2008052516	2.009
2008052517	2.007
2008052518	2.004
2008052519	2.006
2008052520	2.004
2008052521	2.002
2008052522	2.004
2008052523	2.009
2008052600	2.009
2008052601	2.008
2008052602	2.01
2008052603	2.011
2008052604	2.004
2008052605	2.003
2008052606	2.007
2008052607	2.007
2008052608	2.007
2008052609	2.007
2008052610	2.008
2008052611	2.012
2008052612	2.015
2008052613	2.008
2008052614	2.004
2008052615	2.001
2008052616	1.995
2008052617	1.99
2008052618	1.988
2008052619	1.988
2008052620	1.985
2008052621	1.981
2008052622	1.981
2008052623	1.983
2008052700	1.981
2008052701	1.977
2008052702	1.976
2008052703	1.979
2008052704	1.978
2008052705	1.978
2008052706	1.98
2008052707	1.981
2008052708	1.98
2008052709	1.979
2008052710	1.98
2008052711	1.983
2008052712	1.983
2008052713	1.982
2008052714	1.983
2008052715	1.988
2008052716	1.989
2008052717	1.99
2008052718	1.989
2008052719	1.996
2008052720	1.997
2008052721	1.997
2008052722	1.998
2008052723	2
2008052800	1.996
2008052801	1.994
2008052802	1.995
2008052803	1.999
2008052804	1.998
2008052805	1.992
2008052806	1.994
2008052807	1.994
2008052808	1.98
2008052809	1.964
2008052810	1.958
2008052811	1.991
2008052812	1.99
2008052813	1.987
2008052814	1.986
2008052815	1.985
2008052816	1.981
2008052817	1.978
2008052818	1.975
2008052819	1.98
2008052820	1.978
2008052821	1.976
2008052822	1.979
2008052823	1.983
2008052900	1.988
2008052901	1.987
2008052902	1.988
2008052903	1.988
2008052904	1.988
2008052905	1.996
2008052906	2.002
2008052907	2.003
2008052908	2.009
2008052909	2.009
2008052910	2.007
2008052911	2.01
2008052912	2.005
2008052913	2
2008052914	1.994
2008052915	1.993
2008052916	1.992
2008052917	1.993
2008052918	1.994
2008052919	1.991
2008052920	1.986
2008052921	1.98
2008052922	1.975
2008052923	1.971
2008053000	1.963
2008053001	1.953
2008053002	1.948
2008053003	1.949
2008053004	1.95
2008053005	1.946
2008053006	1.949
2008053007	1.949
2008053008	1.95
2008053009	1.945
2008053010	1.938
2008053011	1.932
2008053012	1.926
2008053013	1.917
2008053014	1.912
2008053015	1.912
2008053016	1.91
2008053017	1.909
2008053018	1.909
2008053019	1.917
2008053020	1.92
2008053021	1.919
2008053022	1.919
2008053023	1.92
2008053100	1.914
2008053101	1.907
2008053102	1.902
2008053103	1.904
2008053104	1.908
2008053105	1.911
2008053106	1.917
2008053107	1.924
2008053108	1.927
2008053109	1.926
2008053110	1.925
2008053111	1.924
2008053112	1.917
2008053113	1.909
2008053114	1.904
2008053115	1.903
2008053116	1.902
2008053117	1.903
2008053118	1.909
2008053119	1.917
2008053120	1.923
2008053121	1.925
2008053122	1.929
2008053123	1.933
2008060100	1.93
2008060101	1.923
2008060102	1.919
2008060103	1.922
2008060104	1.921
2008060105	1.925
2008060106	1.933
2008060107	1.94
2008060108	1.947
2008060109	1.948
2008060110	1.948
2008060111	1.947
2008060112	1.939
2008060113	1.93
2008060114	1.924
2008060115	1.921
2008060116	1.917
2008060117	1.916
2008060118	1.92
2008060119	1.932
2008060120	1.945
2008060121	1.953
2008060122	1.957
2008060123	1.958
2008060200	1.951
2008060201	1.945
2008060202	1.943
2008060203	1.944
2008060204	1.945
2008060205	1.946
2008060206	1.956
2008060207	1.965
2008060208	1.97
2008060209	1.973
2008060210	1.975
2008060211	1.976
2008060212	1.969
2008060213	1.961
2008060214	1.953
2008060215	1.946
2008060216	1.936
2008060217	1.934
2008060218	1.942
2008060219	1.95
2008060220	1.955
2008060221	1.96
2008060222	1.963
2008060223	1.964
2008060300	1.961
2008060301	1.955
2008060302	1.948
2008060303	1.946
2008060304	1.943
2008060305	1.942
2008060306	1.948
2008060307	1.955
2008060308	1.96
2008060309	1.965
2008060310	1.967
2008060311	1.97
2008060312	1.967
2008060313	1.96
2008060314	1.953
2008060315	1.948
2008060316	1.943
2008060317	1.936
2008060318	1.937
2008060319	1.946
2008060320	1.956
2008060321	1.959
2008060322	1.962
2008060323	1.967
2008060400	1.966
2008060401	1.959
2008060402	1.951
2008060403	1.949
2008060404	1.946
2008060405	1.944
2008060406	1.946
2008060407	1.954
2008060408	1.96
2008060409	1.966
2008060410	1.972
2008060411	1.979
2008060412	1.979
2008060413	1.976
2008060414	1.969
2008060415	1.963
2008060416	1.955
2008060417	1.948
2008060418	1.948
2008060419	1.951
2008060420	1.954
2008060421	1.959
2008060422	1.963
2008060423	1.968
2008060500	1.969
2008060501	1.966
2008060502	1.961
2008060503	1.96
2008060504	1.957
2008060505	1.952
2008060506	1.953
2008060507	1.959
2008060508	1.964
2008060509	1.969
2008060510	1.974
2008060511	1.98
2008060512	1.982
2008060513	1.98
2008060514	1.976
2008060515	1.973
2008060516	1.967
2008060517	1.958
2008060518	1.957
2008060519	1.962
2008060520	1.966
2008060521	1.968
2008060522	1.972
2008060523	1.98
2008060600	1.982
2008060601	1.983
2008060602	1.98
2008060603	1.979
2008060604	1.978
2008060605	1.977
2008060606	1.974
2008060607	1.975
2008060608	1.977
2008060609	1.981
2008060610	1.988
2008060611	1.995
2008060612	1.997
2008060613	1.997
2008060614	1.992
2008060615	1.992
2008060616	1.992
2008060617	1.987
2008060618	1.981
2008060619	1.983
2008060620	1.984
2008060621	1.986
2008060622	1.987
2008060623	1.99
2008060700	1.989
2008060701	1.989
2008060702	1.992
2008060703	1.993
2008060704	1.995
2008060705	1.992
2008060706	1.988
2008060707	1.988
2008060708	1.983
2008060709	1.979
2008060710	1.976
2008060711	1.975
2008060712	1.973
2008060713	1.971
2008060714	1.965
2008060715	1.969
2008060716	1.959
2008060717	1.953
2008060718	1.951
2008060719	1.947
2008060720	1.945
2008060721	1.936
2008060722	1.932
2008060723	1.934
2008060800	1.929
2008060801	1.924
2008060802	1.921
2008060803	1.921
2008060804	1.916
2008060805	1.91
2008060806	1.907
2008060807	1.906
2008060808	1.904
2008060809	1.902
2008060810	1.903
2008060811	1.905
2008060812	1.905
2008060813	1.902
2008060814	1.901
2008060815	1.897
2008060816	1.894
2008060817	1.891
2008060818	1.887
2008060819	1.896
2008060820	1.893
2008060821	1.893
2008060822	1.887
2008060823	1.886
2008060900	1.887
2008060901	1.884
2008060902	1.883
2008060903	1.893
2008060904	1.903
2008060905	1.923
2008060906	1.924
2008060907	1.921
2008060908	1.921
2008060909	1.92
2008060910	1.918
2008060911	1.918
2008060912	1.915
2008060913	1.914
2008060914	1.913
2008060915	1.912
2008060916	1.911
2008060917	1.91
2008060918	1.909
2008060919	1.912
2008060920	1.911
2008060921	1.909
2008060922	1.912
2008060923	1.914
2008061000	1.91
2008061001	1.908
2008061002	1.906
2008061003	1.91
2008061004	1.913
2008061005	1.92
2008061006	1.92
2008061007	1.923
2008061008	1.93
2008061009	1.923
2008061010	1.928
2008061011	1.924
2008061012	1.925
2008061013	1.924
2008061014	1.922
2008061015	1.924
2008061016	1.92
2008061017	1.917
2008061018	1.919
2008061019	1.926
2008061020	1.926
2008061021	1.931
2008061022	1.932
2008061023	1.937
2008061100	1.938
2008061101	1.933
2008061102	1.93
2008061103	1.934
2008061104	1.94
2008061105	1.944
2008061106	1.949
2008061107	1.951
2008061108	1.951
2008061109	1.951
2008061110	1.946
2008061111	1.943
2008061112	1.937
2008061113	1.932
2008061114	1.927
2008061115	1.927
2008061116	1.924
2008061117	1.921
2008061118	1.921
2008061119	1.924
2008061120	1.928
2008061121	1.927
2008061122	1.926
2008061123	1.93
2008061200	1.923
2008061201	1.916
2008061202	1.914
2008061203	1.916
2008061204	1.914
2008061205	1.916
2008061206	1.918
2008061207	1.921
2008061208	1.923
2008061209	1.922
2008061210	1.917
2008061211	1.914
2008061212	1.91
2008061213	1.904
2008061214	1.909
2008061215	1.91
2008061216	1.905
2008061217	1.903
2008061218	1.908
2008061219	1.916
2008061220	1.914
2008061221	1.914
2008061222	1.914
2008061223	1.912
